# Supplementary material
Source: PubMed Central journal article supplement (PMC7587122)
Supplement: JCM.01824-20-s0001.pdf [file JCM.01824-20-s0001.pdf]

## Supplemental Material

**Table 1. Discrepant analysis of paired NPS, saliva and ANS samples**

| Study # | NPS          |                 | Saliva       |                | ANS          |                 |
|---------|--------------|-----------------|--------------|----------------|--------------|-----------------|
|         | Initial TMA  | Repeat PCR (Ct) | Initial TMA  | Repeat PCR Ct) | Initial TMA  | Repeat PCR (Ct) |
| 1       | Detected     | 24.1            | Detected     | 34.1           | Not Detected | Not Detected    |
| 2       | Detected     | 32.7            | Not Detected | Not Detected   | Detected     | 33.8            |
| 3       | Detected     | 25              | Detected     | 27.1           | Not Detected | Not Detected    |
| 4       | Detected     | 24.6            | Detected     | 25.7           | Not Detected | Not Detected    |
| 5       | Detected     | 27.7            | Detected     | 24.2           | Not Detected | 37.3            |
| 7       | Detected     | 22              | Detected     | 29.9           | Not Detected | 36.6            |
| 9       | Detected     | 19.7            | Not Detected | 33.4           | Detected     | 25.5            |
| 10      | Detected     | 35.7            | Detected     | 22.4           | Not Detected | Not Detected    |
| 12      | Detected     | Not Detected    | Not Detected | Not Detected   | Not Detected | Not Detected    |
| 17      | Detected     | 26.1            | Detected     | 35             | Not Detected | Not Detected    |
| 11      | Not Detected | 37.1            | Detected     | 28.9           | Not Detected | Not Detected    |
| 13      | Not Detected | 37.3            | Detected     | 18.3           | Not Detected | Not Detected    |
| 14      | Not Detected | Not Detected    | Detected     | 37.5           | Not Detected | Not Detected    |
| 16      | Not Detected | Not Detected    | Detected     | Not Detected   | Not Detected | Not Detected    |
| 18      | Not Detected | Not Detected    | Detected     | 25.2           | Detected     | 29.7            |

### Healthcare worker instructions to collect nasopharyngeal swab

1. Use a nasopharyngeal flocked, synthetic fiber mini-tip swabs with plastic or wire shafts
2. Tilt patient's head back 70°
3. Insert flexible shaft mini-tip swab through nares parallel to palate (not upwards) until
  - a. Resistance is met, OR
  - b. Distance is equivalent to the distance from the patient's ear to their nostril
4. Gently rub and roll swab
5. Leave swab in place for several seconds to absorb secretions
6. Slowly remove swab while rotating it
7. Immediately place swab in sterile tubes containing transport media

### Patient Instructions for self-collected anterior nasal swab

1. Open the swab package without touching the swab tip.
2. Take the swab out of the package and hold it by the handle.
3. Hand the swab to the patient.
4. Tilt head back slightly (approximately 20 degrees).
5. Gently insert the swab approximately 1 inch into the nostril (or until resistance is met) following a horizontal pathway, parallel to roof of mouth. **DO NOT** point the swab tip upwards toward the eyes.
6. The entire swab tip should be in the nostril. The patient may feel some pressure with insertion, but this should not hurt.
7. Rotate the swab three times leaving the swab in place for several seconds to absorb secretions.
8. Remove the swab from the nostril without touching the tip of the swab.
9. Using the same swab, **repeat the same process for the other nostril.**
10. After sampling both nostrils, have the patient place the swab in the pre-opened transport tube so that the tip comes in to contact with the liquid at the bottom of the tube.
11. The provider will snap the swab handle at the break point, **securely** screw on the tube cap and make sure the tube is labeled with the patient's information.

### Patient instructions for saliva collection

1. Open the saliva tube package and remove the contents.
2. Hand the open collection device to the patient
3. Ask the patient to pool saliva in their mouth
4. Repeatedly spit into the saliva tube
5. Fill the tube with saliva at least to the fill line (3mL), going over is o.k., a minimum of half the way to the fill line (1.5mL) is required.

6. Massaging the cheek may help stimulate saliva production
7. Hand the tube back to the healthcare provider
8. **Securely** screw the cap on to the saliva transport tube
9. Make sure the tube is labeled with the patient's information.

## Study Kit

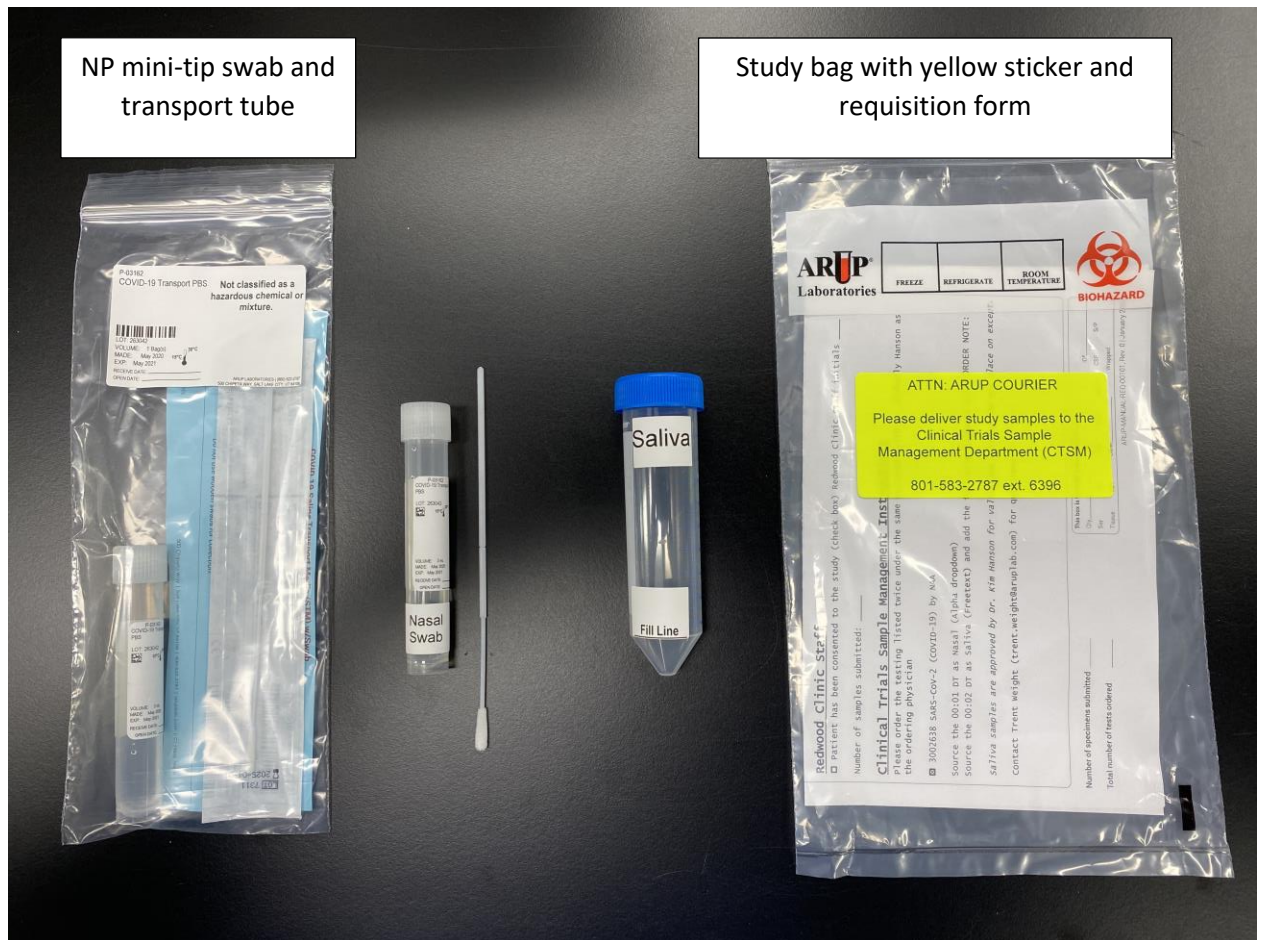

### Study kit contents

- 1) NP swab and transport tube (packaged separately)
- 2) Nasal swab and transport tube
- 3) Saliva transport tube
- 4) Requisition form
- 5) Collection Instructions
- 6) Consent summary document

ARUP Universal Transport Media

| <b>Material Description</b>       | <b>Amount (units)</b> |
|-----------------------------------|-----------------------|
| Bovine Serum Albumin              | 175 g                 |
| L-Cysteine Hydrochloride          | 8.4 g                 |
| Gelatin                           | 175 g                 |
| L-Glutamic Acid                   | 25.2 g                |
| HEPES                             | 210 g                 |
| Vancomycin                        | 175 mL                |
| Amphotericin B                    | 280 mL                |
| Phenol Red                        | 385 mg                |
| Sodium Bicarbonate                | 12.25 g               |
| Colistin                          | 606 mg                |
| HBSS (10X)                        | 3.5 L                 |
| Clinical Laboratory Reagent Water | 31.5 L                |
| Sucrose                           | 2.397 kg              |

ARUP 1X Phosphate buffered saline

| <b>Material Description</b>                            | <b>Amount (units)</b> |
|--------------------------------------------------------|-----------------------|
| Sodium Chloride                                        | 876.6 g               |
| Sodium Phosphate, Dibasic                              | 113.6 g               |
| Potassium phosphate (KH <sub>2</sub> PO <sub>4</sub> ) | 40.8 g                |
| Water, Molecular Grade                                 | 100 L                 |
